# Supplementary material for: Impact of Dietary Nutrients on the Prevalence of Dry Eye Syndrome among Korean Women Aged 40 and above: Evidence from the Korea National Health and Nutrition Examination Survey
Source: MDPI journal article supplement (doi:10.3390/nu16030372), 2024-01-26
Supplement: s1 [file s1]

Table S1. Average daily intake of dietary nutrients in subjects with and without dry eye syndrome

| Nutrients                      | DES <sup>1)</sup> |         | Non-DES    |         | <i>p</i> -value <sup>2)</sup> |
|--------------------------------|-------------------|---------|------------|---------|-------------------------------|
|                                | (n=7,134)         |         | (n=85,754) |         |                               |
|                                | Mean (SD)         |         | Mean (SD)  |         |                               |
| Energy (kcal)                  | 1699.78           | 580.68  | 1600.86    | 584.45  | <.0001                        |
| Water (g)                      | 1060.44           | 608.75  | 1002.68    | 529.17  | <.0001                        |
| Carbohydrate (g)               | 263.45            | 97.42   | 259.71     | 99.77   | 0.0023                        |
| Protein (g)                    | 64.71             | 28.84   | 58.43      | 25.77   | <.0001                        |
| Fat (g)                        | 41.98             | 23.86   | 35.14      | 23.33   | <.0001                        |
| Saturated fatty acid (g)       | 12.46             | 8.19    | 10.41      | 7.81    | <.0001                        |
| Monounsaturated fatty acid (g) | 13.71             | 8.89    | 10.71      | 8.17    | <.0001                        |
| Polyunsaturated fatty acid (g) | 10.99             | 6.38    | 10.00      | 7.05    | <.0001                        |
| N3 fatty acid (g)              | 1.70              | 1.31    | 1.85       | 1.78    | <.0001                        |
| N6 fatty acid (g)              | 9.27              | 5.56    | 8.13       | 5.95    | <.0001                        |
| Cholesterol (mg)               | 237.69            | 177.00  | 188.16     | 162.05  | <.0001                        |
| Fiber (g)                      | 28.01             | 13.17   | 27.89      | 13.69   | 0.4640                        |
| Sugar (g)                      | 60.96             | 38.40   | 57.94      | 40.01   | <.0001                        |
| Calcium (mg)                   | 459.20            | 230.50  | 493.90     | 290.49  | <.0001                        |
| Phosphate (mg)                 | 1027.45           | 433.77  | 965.24     | 405.81  | <.0001                        |
| Iron (mg)                      | 9.62              | 4.30    | 8.91       | 4.94    | <.0001                        |
| Sodium (mg)                    | 3067.78           | 1551.92 | 2852.51    | 1565.19 | <.0001                        |
| Potassium (mg)                 | 2881.66           | 1460.99 | 2770.13    | 1348.32 | <.0001                        |
| Vitamin A (µg RAE)             | 433.92            | 332.53  | 413.00     | 468.34  | 0.0002                        |
| Carotene (µg)                  | 3807.54           | 3458.75 | 3443.23    | 3275.81 | <.0001                        |
| Retinol (µg)                   | 116.58            | 136.82  | 126.05     | 340.03  | 0.0195                        |
| Vitamin B1 (mg)                | 1.11              | 0.58    | 1.03       | 0.67    | <.0001                        |
| Vitamin B2 (mg)                | 1.46              | 0.70    | 1.31       | 0.67    | <.0001                        |
| Niacin (mg)                    | 11.49             | 6.55    | 10.31      | 6.15    | <.0001                        |
| Vitamin C (mg)                 | 73.78             | 85.61   | 73.77      | 72.91   | 0.9916                        |
| Magnesium (mg)                 | 321.21            | 139.55  | 307.97     | 133.67  | <.0001                        |
| Zinc (mg)                      | 10.09             | 4.08    | 9.22       | 4.00    | <.0001                        |
| Vitamin D (µg)                 | 2.63              | 2.81    | 2.92       | 6.53    | 0.0002                        |
| Vitamin E (mg α-TE)            | 6.83              | 3.40    | 6.38       | 4.13    | <.0001                        |
| Folate (µg DFE)                | 336.01            | 187.71  | 331.70     | 166.04  | 0.0374                        |

1) DES; Dry eye syndrome

2) Different between two groups at  $\alpha=0.05$  by ANCOVA test
